# Supplementary material for: Mutational History of a Human Cell Lineage from Somatic to Induced Pluripotent Stem Cells
Source: PLoS Genet. 2016 Apr 7;12(4):e1005932. doi: 10.1371/journal.pgen.1005932 (PMC4824386; doi:10.1371/journal.pgen.1005932)
Supplement: S10 Table — The SNVs identified through WGS of S7 EPCs and iPSCs were divided according to Mutant Allele Frequency (MAF) of > 30% (clonal mutations) and ≤ 30% (subclonal mutations). These SNVs were validated using an orthogonal platform in duplicates with high specificity as demonstrated by the low percentage of false positives. (XLSX) [file pgen.1005932.s012.xlsx]

## Sheet: Sup Table 10 
S10 Table. Summary of validation of SNVs for S7 EPCs and iPSCs
		Validation results of SNVs with MAF > 30% (WGS)						Validation results of SNVs with MAF ≤ 30% (WGS)
		# of SNVs analysed	# of SNVs validated	# of false positives	% of false positives	# of SNVs failed		# of SNVs analyzed	# of SNVs validated	# of false positives	% of false positives	# of SNVs failed
EPC		154	154	0	0	0		18	17	1	0.0555556	0
RE2		228	212	7	0.0319635	9		60	53	4	0.0701754	3
RE14		319	296	8	0.0263158	15		90	80	5	0.0588235	4
RE17		167	157	6	0.0368098	4		31	26	4	0.133333	1
